# Supplementary material
Source: Springer Nature journal article supplement (https://www.springermedizin.de/resource/supplementary/12884_2012_763_MOESM2_ESM.pdf/9458148)

PIGF at 18th to 20th weeks

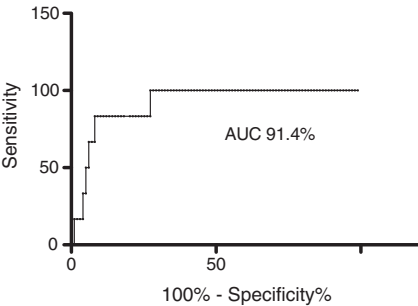

PIGF at 26th to 28th weeks

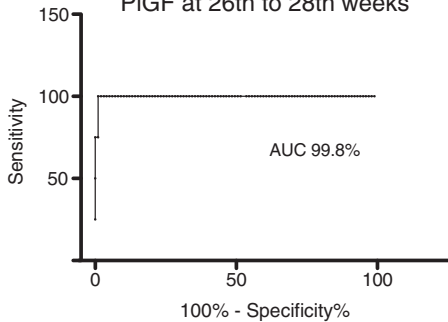

sFlt-1/PIGF ratio at 18th to 20th weeks

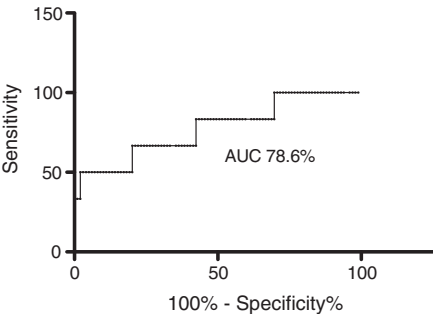

sFlt-1/PIGF ratio at 26th to 28th weeks

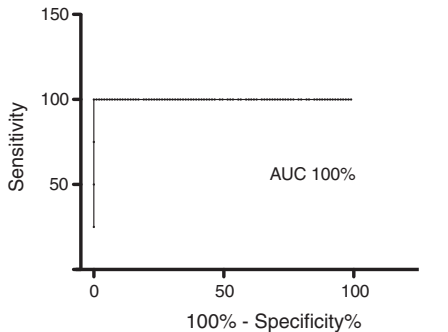

Supplement: MOESM2 [file 9458148]
